# Supplementary material for: Macrolide-Resistant Mycoplasma pneumoniae Infections in Pediatric Community-Acquired Pneumonia
Source: PubMed Central journal article supplement (PMC7323531; doi:10.3201/eid2607.200017), 2020-07
Supplement: 20-0017-Techapp-s1.pdf [file 20-0017-Techapp-s1.pdf]

# Macrolide-Resistant *Mycoplasma pneumoniae* Infections in Pediatric Community-Acquired Pneumonia

## Appendix

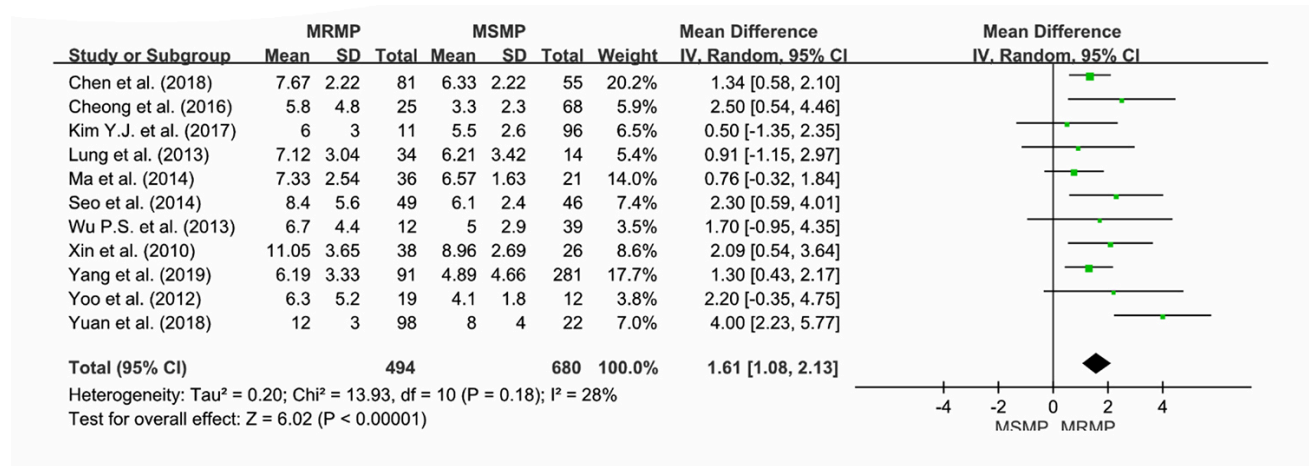

**Appendix Figure 1.** Forest plots depicting the difference in length of hospital stay (days) between macrolide-resistant *Mycoplasma pneumoniae* (MRMP) and macrolide-sensitive *Mycoplasma pneumoniae* (MSMP).

**A**

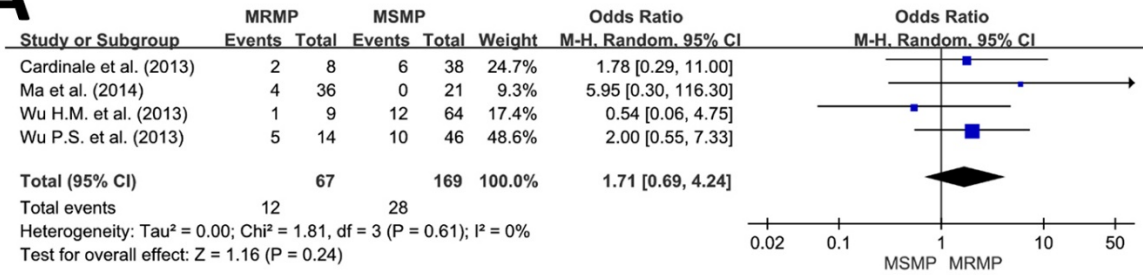

**B**

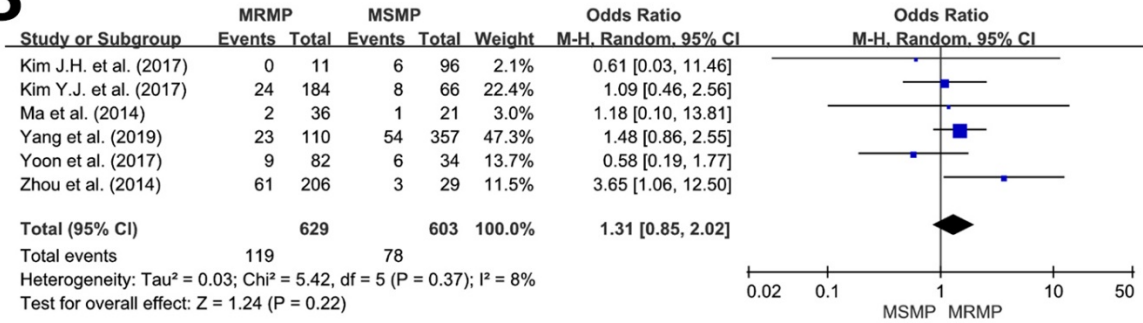

**Appendix Figure 2.** Forest plots comparing the clinical manifestations: A) dyspnea; B) extrapulmonary symptoms.

**A**

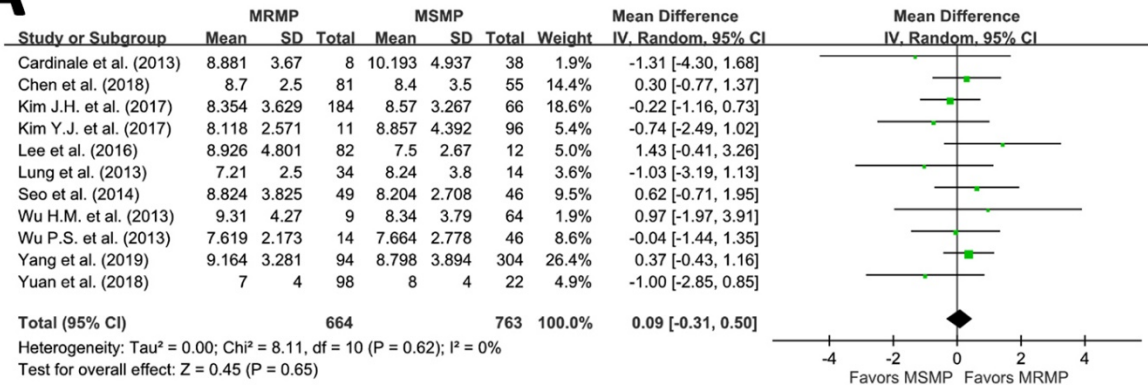

**B**

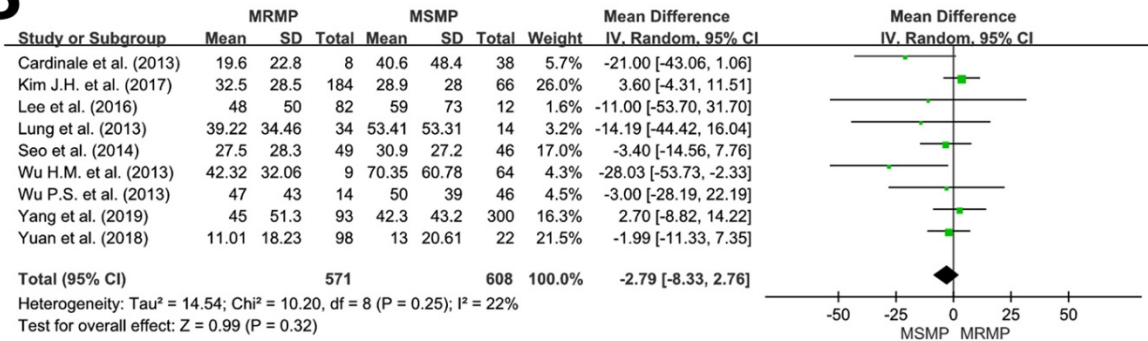

**Appendix Figure 3.** Forest plots of laboratory differences between macrolide-resistant *Mycoplasma pneumoniae* (MRMP) and macrolide-sensitive *Mycoplasma pneumoniae* (MSMP): A) leukocyte count ( $\times 10^3$ ); B) C-reactive protein (mg/L).

**A**

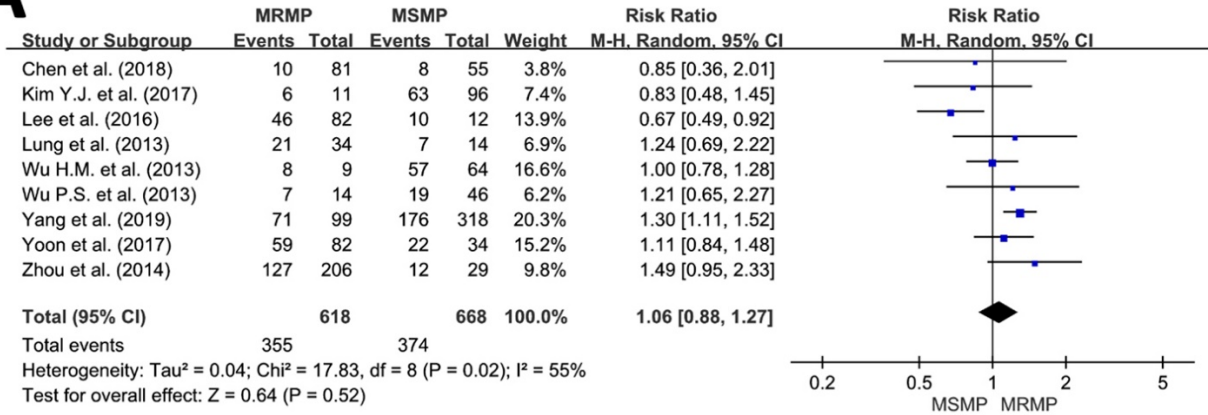

**B**

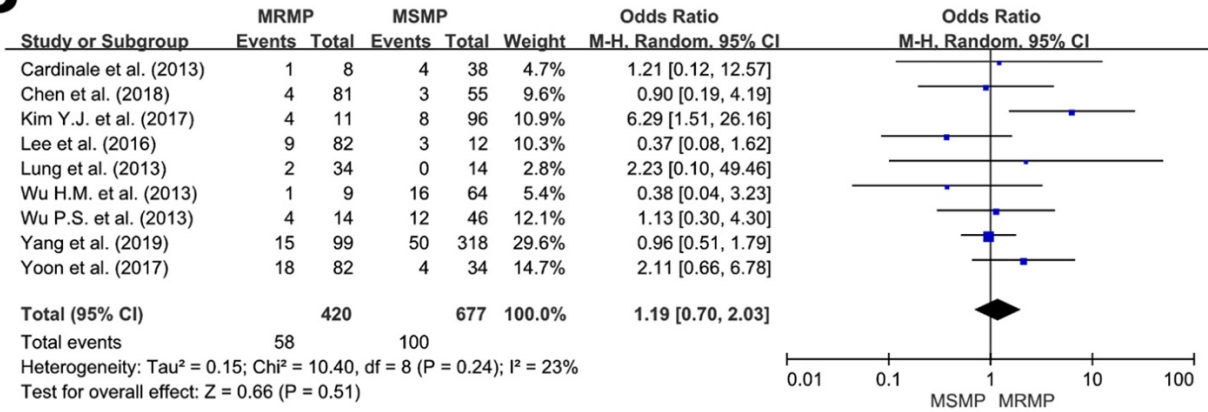

**Appendix Figure 4.** Forest plots illustrating the chest radiographic findings in *M. pneumoniae* infections:

A) consolidation; B) pleural effusion.
